# Supplementary material for: Effects of breed, management and personality on cortisol reactivity in sport horses
Source: PubMed Central journal article supplement (PMC6886778; doi:10.1371/journal.pone.0221794), 2019-12-02
Supplement: pone.0221794.s001.pdf [file pone.0221794.s001.pdf]

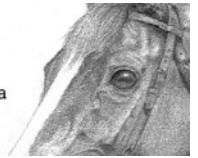

## Questionnaire (English)

### Part 1:

Date: \_\_\_\_\_

#### General questions:

UELN/SVPS Number: \_\_\_\_\_

Name of the horse: \_\_\_\_\_

Horse details (Breed, gender, date birth, color): \_\_\_\_\_

Discipline (f.e. show jumping, dressage etc.): \_\_\_\_\_

Name owner and rider: \_\_\_\_\_

Phone number of responsible person: \_\_\_\_\_

Email of responsible person: \_\_\_\_\_

Location of the horse (Canton): \_\_\_\_\_

Origin/Ancestry: F: \_\_\_\_\_ MF: \_\_\_\_\_

For how long do you own/know the horse? \_\_\_\_\_

#### Temperament of the horse?

calm       temperamental       nervous

#### Husbandry

##### 1) Does the horse live in a group with other horses?

yes       only on pasture  
 no

##### 2) How many hours does the horse spent outside of its stall (riding, pasture etc.)?

0-1h       1-4h       4-12h       > 12h

#### Feeding:

##### 3) During feeding, does the horse show aggressiveness against other horses or humans?

yes       no

##### 4) How is the horse's appetite?

good, eats everything immediately  
 moderate, eats with breaks and sometimes it does not eat all roughage  
 poor, eats only slowly and not everything, only favorite food

**Training:**

**5) Number of training days per week?**

- < 1 times       4-5 times       7 times  
 1-3 times       6 times

**6) How many different people ride/train the horse?**

- 1       2       3       >3

**7) How many times per year does the horse go to competitions?**

- 1-3 times     4-8 times     9-15 times     16-25 times     more

**8) What is the horse's level of performance at horse shows? \_\_\_\_\_**

**9) How is the horse's performance?**

- very good/good  
 moderate  
 poor

**10) How is the horse's motivation?**

- very good/good  
 moderate  
 poor

**11) Does the horse's motivation change during work (several answers possible)?**

- no  
If yes:       in the beginning not good  
                  in the middle not good  
                  in the end not good  
                  always not good  
                  always different  
                  during competition season not good

**12) Does the horse enjoy moving around (riding, pasture etc.)?**

- very much  
 enough  
 yes during riding, not at pasture  
 yes at pasture, not during riding  
 no

### **Stereotypies:**

- weaving?  never  sometimes  regularly  excessive
- crib-biting (grasping fixed object)?  never  sometimes  regularly  excessive
- crib-biting (windsucking)?  never  sometimes  regularly  excessive
- stall walking?  never  sometimes  regularly  excessive
- teeth sharpening?  never  sometimes  regularly  excessive

### **Behavioral problems:**

- dependency on other horses?  never  sometimes  regularly  excessive
- biting?  never  sometimes  regularly  excessive
- kicking?  never  sometimes  regularly  excessive
- bucking?  never  sometimes  regularly  excessive
- rearing up?  never  sometimes  regularly  excessive
- kicking against the wall?  never  sometimes  regularly  excessive

|           |                                                                                                                               |
|-----------|-------------------------------------------------------------------------------------------------------------------------------|
| never     | = no signs of stereotypies/behavioral problems                                                                                |
| sometimes | = stereotypies/behavioral problems appear not every day                                                                       |
| regularly | = stereotypies/behavioral problems appear every day in relation to a certain stimulus (f.e. after feeding, after riding etc.) |
| excessive | = stereotypies/behavioral problems appear every day, except during riding etc.                                                |

### **Clinical signs:**

**Did you notice one or several of the following clinical signs:**

- yawning
- weight loss
- problems gaining weight
- teeth grinding

### **Part 2:**

(Tick the correct number on the scale)

**1) (Nervousness)** Becomes nervous about insects, noises etc.:

Nervous Calm

1 ----- 2 ----- 3 ----- 4 ----- 5 ----- 6 ----- 7 ----- 8 ----- 9

**2) (Concentration)** Easy trainable and not distracted by the environment:

poor excellent  
1 ----- 2 ----- 3 ----- 4 ----- 5 ----- 6 ----- 7 ----- 8 ----- 9

**3) (Self-reliance)** Is at ease, if left alone, away from the herd:

restless at ease  
1 ----- 2 ----- 3 ----- 4 ----- 5 ----- 6 ----- 7 ----- 8 ----- 9

**4) (Trainability)** Easy and promptly trainable:

poor excellent  
1 ----- 2 ----- 3 ----- 4 ----- 5 ----- 6 ----- 7 ----- 8 ----- 9

**5) (Excitability)** Easily getting excited:

excitable not excitable  
1 ----- 2 ----- 3 ----- 4 ----- 5 ----- 6 ----- 7 ----- 8 ----- 9

**6) (Friendliness people)** Is never aggressive or fearful:

unfriendly friendly  
1 ----- 2 ----- 3 ----- 4 ----- 5 ----- 6 ----- 7 ----- 8 ----- 9

**7) (Curiosity)** Is interested in novel objects and approaches them:

rarely frequently  
1 ----- 2 ----- 3 ----- 4 ----- 5 ----- 6 ----- 7 ----- 8 ----- 9

**8) (Memory)** Memorizes what it learned or what was trained:

poor excellent  
1 ----- 2 ----- 3 ----- 4 ----- 5 ----- 6 ----- 7 ----- 8 ----- 9

**9) (Panic)** Gets excited to an abnormal extent:

frequently never  
1 ----- 2 ----- 3 ----- 4 ----- 5 ----- 6 ----- 7 ----- 8 ----- 9

**10) (Cooperation)** Is cooperative with caretakers when handled:

never frequently  
1 ----- 2 ----- 3 ----- 4 ----- 5 ----- 6 ----- 7 ----- 8 ----- 9

**11) (Inconsistent emotionality)** Is unpredictable from day to day:

inconsistent consistent  
1 ----- 2 ----- 3 ----- 4 ----- 5 ----- 6 ----- 7 ----- 8 ----- 9

**12) (Stubbornness)** Is obstinate once it resists a command:

stubborn obedient  
1 ----- 2 ----- 3 ----- 4 ----- 5 ----- 6 ----- 7 ----- 8 ----- 9

**13) (Docility)** Is docile in general:

active docile  
1 ----- 2 ----- 3 ----- 4 ----- 5 ----- 6 ----- 7 ----- 8 ----- 9

**14) (Vigilance)** Is vigilant about surroundings:

never always  
1 ----- 2 ----- 3 ----- 4 ----- 5 ----- 6 ----- 7 ----- 8 ----- 9

**15) (Perseverance)** Is patient with various stimuli:

impatient patient  
1 ----- 2 ----- 3 ----- 4 ----- 5 ----- 6 ----- 7 ----- 8 ----- 9

**16) (Friendliness horses)** Interacts with other horses in a friendly manner:

unfriendly friendly  
1 ----- 2 ----- 3 ----- 4 ----- 5 ----- 6 ----- 7 ----- 8 ----- 9

**17) (Competitiveness)** Is dominant in antagonistic encounters with other horses:

subordinate dominant  
1 ----- 2 ----- 3 ----- 4 ----- 5 ----- 6 ----- 7 ----- 8 ----- 9

**18) (Skittishness)** Gets surprised easily:

skittish not skittish  
1 ----- 2 ----- 3 ----- 4 ----- 5 ----- 6 ----- 7 ----- 8 ----- 9

**19) (Timidity)** Is timid in a novel environment:

timid audacious  
1 ----- 2 ----- 3 ----- 4 ----- 5 ----- 6 ----- 7 ----- 8 ----- 9

**20) (Cooperation)** Is cooperative during riding:

never always  
1 ----- 2 ----- 3 ----- 4 ----- 5 ----- 6 ----- 7 ----- 8 ----- 9

**21) (Cooperation)** Is cooperative during trailer loading:

never always  
1 ----- 2 ----- 3 ----- 4 ----- 5 ----- 6 ----- 7 ----- 8 ----- 9

**22) (Cooperation)** Is cooperative during transportation?

never always  
1 ----- 2 ----- 3 ----- 4 ----- 5 ----- 6 ----- 7 ----- 8 ----- 9

**23) (Capacity recovery time)** Recovers slowly after putatively stressful events such as competitions or transports:

slowly fast  
1 ----- 2 ----- 3 ----- 4 ----- 5 ----- 6 ----- 7 ----- 8 ----- 9

**24) (Capacity infections)** Is susceptible to infections (e.g. respiratory infections) during or after putatively stressful events such as competitions or transports?

susceptible not susceptible  
1 ----- 2 ----- 3 ----- 4 ----- 5 ----- 6 ----- 7 ----- 8 ----- 9

**25) (Capacity inappetence)** Shows inappetence during or after putatively stressful events such as competitions or transports?

always never  
1 ----- 2 ----- 3 ----- 4 ----- 5 ----- 6 ----- 7 ----- 8 ----- 9

**26) (Capacity discomfort)** Shows signs of discomfort during or after putatively stressful events such as competitions or transports (Flehmen, colic signs, increased phases of laying down...)?

always never  
1 ----- 2 ----- 3 ----- 4 ----- 5 ----- 6 ----- 7 ----- 8 ----- 9



## Fragebogen (German)

### Teil 1:

Datum: \_\_\_\_\_

#### Allgemeine Fragen:

UELN/SVPS Nummer: \_\_\_\_\_

Name des Pferdes: \_\_\_\_\_

Signalement (Rasse, Geschlecht, Geburtsdatum, Farbe): \_\_\_\_\_

Disziplin (z.B. Springen, Dressur etc.): \_\_\_\_\_

Name Besitzer/in und Reiter/in: \_\_\_\_\_

Telefon der zuständigen Person: \_\_\_\_\_

Email der zuständigen Person: \_\_\_\_\_

Standort des Pferdes (Kanton): \_\_\_\_\_

Herkunft/Abstammung: V: \_\_\_\_\_ MV: \_\_\_\_\_

Seit wann ist das Pferd in ihrem Besitz/kennen Sie es? \_\_\_\_\_

#### Temperament des Pferdes?

- gelassen, ruhig     temperamentvoll, aber kooperativ     schnell nervös,  
eher unkooperativ

#### Haltung

##### 1) Lebt Ihr Pferd in einer Gruppe?

- Ja     nur auf der Weide  
 Nein

##### 2) Wie viele Stunden verbringt Ihr Pferd durchschnittlich/Tag draussen (Reiten, Weide etc.)?

- 0-1h     1-4h     4-12h     > 12h

#### Fütterung:

##### 3) Ist Ihr Pferd futterneidisch?

- Ja     Nein

##### 4) Wie ist der Appetit Ihres Pferdes?

- gut, frisst sofort alles auf  
 mässig, frisst mit Pausen und lässt Raufutter manchmal liegen  
 eher ungenügend, frisst nur langsam und nicht alles, nur „Lieblingsfutter“

## **Training:**

### **5) Wie oft pro Woche wird das Pferd trainiert?**

- < 1Mal                       4-5 Mal                       7 Mal  
 1-3 Mal                       6 Mal

### **6) Wieviele verschiedene Leute reiten/trainieren das Pferd?**

- 1                       2                       3                       >3

### **7) Wie oft pro Jahr startet es an Turnieren?**

- 1-3 Mal     4-8 Mal     9-15 Mal     16-25 Mal     mehr

### **8) Auf welchem Niveau startet das Pferd? \_\_\_\_\_**

### **9) Bringt das Pferd dem Ausbildungsstand entsprechend gute Leistung?**

- sehr gut/gut  
 genügend  
 ungenügend/schlecht

### **10) Ist das Pferd motiviert bei der Arbeit?**

- sehr gut/gut  
 genügend  
 ungenügend/schlecht

### **11) Zeigt das Pferd während der Arbeit Motivationsschwankungen (Mehrfachnennung möglich)?**

- Nein  
Wenn ja:     Anfangs nicht gut  
                   Mitte der Arbeit nicht gut  
                   Ende der Arbeit nicht gut  
                   während jeder Arbeitsphase nicht gut  
                   immer unterschiedlich  
                   während der Saison nicht gut

### **12) Ist das Pferd bewegungsfreudig (Reiten, Weide etc.)?**

- Sehr bewegungsfreudig  
 Genügend bewegungsfreudig  
 Beim Reiten schon, aber auf der Weide nicht  
 Auf der Weide schon, aber beim Reiten nicht  
 Nein, nicht bewegungsfreudig



## Stereotypien:

- |                  |                                    |                                    |                                      |                                           |
|------------------|------------------------------------|------------------------------------|--------------------------------------|-------------------------------------------|
| - Weben?         | <input type="checkbox"/> gar nicht | <input type="checkbox"/> ab und zu | <input type="checkbox"/> regelmässig | <input type="checkbox"/> dauernd/exzessiv |
| - Aufsetzkopper? | <input type="checkbox"/> gar nicht | <input type="checkbox"/> ab und zu | <input type="checkbox"/> regelmässig | <input type="checkbox"/> dauernd/exzessiv |
| - Freikopper?    | <input type="checkbox"/> gar nicht | <input type="checkbox"/> ab und zu | <input type="checkbox"/> regelmässig | <input type="checkbox"/> dauernd/exzessiv |
| - Boxenlaufen?   | <input type="checkbox"/> gar nicht | <input type="checkbox"/> ab und zu | <input type="checkbox"/> regelmässig | <input type="checkbox"/> dauernd/exzessiv |
| - Zahnwetzen?    | <input type="checkbox"/> gar nicht | <input type="checkbox"/> ab und zu | <input type="checkbox"/> regelmässig | <input type="checkbox"/> dauernd/exzessiv |

## Verhaltensprobleme.

- |                        |                                    |                                    |                                      |                                           |
|------------------------|------------------------------------|------------------------------------|--------------------------------------|-------------------------------------------|
| - Kleben?              | <input type="checkbox"/> gar nicht | <input type="checkbox"/> ab und zu | <input type="checkbox"/> regelmässig | <input type="checkbox"/> dauernd/exzessiv |
| - Beissen?             | <input type="checkbox"/> gar nicht | <input type="checkbox"/> ab und zu | <input type="checkbox"/> regelmässig | <input type="checkbox"/> dauernd/exzessiv |
| - Schlagen?            | <input type="checkbox"/> gar nicht | <input type="checkbox"/> ab und zu | <input type="checkbox"/> regelmässig | <input type="checkbox"/> dauernd/exzessiv |
| - Bocken?              | <input type="checkbox"/> gar nicht | <input type="checkbox"/> ab und zu | <input type="checkbox"/> regelmässig | <input type="checkbox"/> dauernd/exzessiv |
| - Steigen?             | <input type="checkbox"/> gar nicht | <input type="checkbox"/> ab und zu | <input type="checkbox"/> regelmässig | <input type="checkbox"/> dauernd/exzessiv |
| - gegen Wand schlagen? | <input type="checkbox"/> gar nicht | <input type="checkbox"/> ab und zu | <input type="checkbox"/> regelmässig | <input type="checkbox"/> dauernd/exzessiv |

|                  |                                                                                                                                                      |
|------------------|------------------------------------------------------------------------------------------------------------------------------------------------------|
| gar nicht        | = Keine Zeichen von Stereotypien/Verhaltensproblemen                                                                                                 |
| ab und zu        | = Stereotypien/Verhaltensprobleme treten nicht täglich auf                                                                                           |
| regelmässig      | = Stereotypien/Verhaltensprobleme treten täglich auf und beziehen sich auf einen bestimmten Stimulus (z. B. nach dem Fressen, nach dem Reiten, etc.) |
| dauernd/exzessiv | = Stereotypien/Verhaltensprobleme treten den ganzen Tag auf, ausser während dem Reiten, etc.                                                         |

## Symptome:

Ist Ihnen eines oder mehrere der folgenden Symptome bei ihrem Pferd aufgefallen:

- Vermehrtes Gähnen
- Gewichtsverlust
- Probleme an Gewicht zuzunehmen
- Zähneknirschen

## Teil 2:

(Kreuzen Sie die zutreffende Zahl auf der Skala an)

**1) (Nervosität)** Wird bei Insekten oder Geräuschen etc. schnell nervös:

Nervös Ruhig  
1 ----- 2 ----- 3 ----- 4 ----- 5 ----- 6 ----- 7 ----- 8 ----- 9

**2) (Konzentration)** Ist gut trainierbar und lässt sich nicht von der Umgebung ablenken.

Schlecht Ausgezeichnet  
1 ----- 2 ----- 3 ----- 4 ----- 5 ----- 6 ----- 7 ----- 8 ----- 9

**3) (Selbstvertrauen)** Ist ruhig/ausgeglichen, wenn es alleine gelassen wird, weg von anderen

Pferden:

Ruhelos Ausgeglichen  
1 ----- 2 ----- 3 ----- 4 ----- 5 ----- 6 ----- 7 ----- 8 ----- 9

**4) (Trainierbarkeit)** Lässt sich prompt und leicht trainieren:

Schlecht Ausgezeichnet  
1 ----- 2 ----- 3 ----- 4 ----- 5 ----- 6 ----- 7 ----- 8 ----- 9

**5) (Erregbarkeit)** Ist leicht erregbar:

Leicht erregbar Nicht erregbar  
1 ----- 2 ----- 3 ----- 4 ----- 5 ----- 6 ----- 7 ----- 8 ----- 9

**6) (Freundlichkeit gegenüber Menschen)** Ist nie aggressiv oder ängstlich:

Unfreundlich Freundlich  
1 ----- 2 ----- 3 ----- 4 ----- 5 ----- 6 ----- 7 ----- 8 ----- 9

**7) (Neugier)** Ist an neuen Gegenständen interessiert und nähert sich diesen an:

Selten Häufig  
1 ----- 2 ----- 3 ----- 4 ----- 5 ----- 6 ----- 7 ----- 8 ----- 9

**8) (Erinnerungsvermögen)** erinnert sich an Gelerntes oder Trainiertes:

Schlecht Ausgezeichnet  
1 ----- 2 ----- 3 ----- 4 ----- 5 ----- 6 ----- 7 ----- 8 ----- 9

**9) (Panik)** Regt sich übermässig auf:

Häufig Nie  
1 ----- 2 ----- 3 ----- 4 ----- 5 ----- 6 ----- 7 ----- 8 ----- 9

**10) (Kooperation)** Ist im Umgang/bei der Pflege kooperativ:

Nie Häufig  
1 ----- 2 ----- 3 ----- 4 ----- 5 ----- 6 ----- 7 ----- 8 ----- 9

**11) (Launenhaftigkeit)** Verhält sich von Tag zu Tag unberechenbar:

Wechselhaft Gleichbleibend  
1 ----- 2 ----- 3 ----- 4 ----- 5 ----- 6 ----- 7 ----- 8 ----- 9

**12) (Sturheit)** Ist eigensinnig, wenn es sich gegen Hilfen oder Anweisungen wehrt:

Stur Folgsam  
1 ----- 2 ----- 3 ----- 4 ----- 5 ----- 6 ----- 7 ----- 8 ----- 9

**13) (Fügsamkeit)** Ist im Allgemeinen brav/folgsam:

Aktiv/lebhaft Ruhig/gefügig  
1 ----- 2 ----- 3 ----- 4 ----- 5 ----- 6 ----- 7 ----- 8 ----- 9

**14) (Wachsamkeit)** Ist wachsam gegenüber der Umgebung:

Nie Immer  
1 ----- 2 ----- 3 ----- 4 ----- 5 ----- 6 ----- 7 ----- 8 ----- 9

**15) (Langmütigkeit)** Ist gelassen/unbeeindruckt gegenüber/bei verschiedenen Reizen:

Ungeduldig/Erregbar Langmütig  
1 ----- 2 ----- 3 ----- 4 ----- 5 ----- 6 ----- 7 ----- 8 ----- 9

**16) (Freundlichkeit mit anderen Pferden)** Interagiert mit anderen Pferden auf freundliche Art und Weise:

Unfreundlich Freundlich  
1 ----- 2 ----- 3 ----- 4 ----- 5 ----- 6 ----- 7 ----- 8 ----- 9

**17) (Konkurrenzverhalten)** Ist dominant bei Konflikten mit anderen Pferden:

Untergeordnet Dominant  
1 ----- 2 ----- 3 ----- 4 ----- 5 ----- 6 ----- 7 ----- 8 ----- 9

**18) (Schreckhaftigkeit)** Lässt sich leicht überraschen:

Schreckhaft Nicht schreckhaft  
1 ----- 2 ----- 3 ----- 4 ----- 5 ----- 6 ----- 7 ----- 8 ----- 9

**19) (Schüchternheit/Ängstlichkeit)** Ist schüchtern/zurückhaltend/scheu in einer neuen Umgebung:

Schüchtern Mutig/Kühn  
1 ----- 2 ----- 3 ----- 4 ----- 5 ----- 6 ----- 7 ----- 8 ----- 9

**20) (Kooperation)** Ist beim Reiten kooperativ:

Nie Immer  
1 ----- 2 ----- 3 ----- 4 ----- 5 ----- 6 ----- 7 ----- 8 ----- 9

**21) (Kooperation)** Ist beim Verladen kooperativ:

Nie Immer  
1 ----- 2 ----- 3 ----- 4 ----- 5 ----- 6 ----- 7 ----- 8 ----- 9

**22) (Kooperation)** Ist ruhig während des Transports?

Nie Immer  
1 ----- 2 ----- 3 ----- 4 ----- 5 ----- 6 ----- 7 ----- 8 ----- 9

**23) (Belastbarkeit)** Braucht nach grösseren Anstrengungen wie Transporten und Turnieren lange, um sich zu erholen:

Erholt sich sehr langsam

Erholt sich sehr schnell

1 ----- 2 ----- 3 ----- 4 ----- 5 ----- 6 ----- 7 ----- 8 ----- 9

**24) (Belastbarkeit)** Ist nach grösseren Anstrengungen wie Transporten oder Turnieren anfälliger für Infekte, z.B. der Atemwege (Husten, Nasenausfluss etc.)?

Sehr anfällig

Gar nicht anfällig

1 ----- 2 ----- 3 ----- 4 ----- 5 ----- 6 ----- 7 ----- 8 ----- 9

**25) (Belastbarkeit)** Zeigt während oder nach grösseren Anstrengungen wie Transporten und Turnieren vermehrt Anzeichen von Inappetenz?

Immer

Nie

1 ----- 2 ----- 3 ----- 4 ----- 5 ----- 6 ----- 7 ----- 8 ----- 9

**26) (Belastbarkeit)** Zeigt während oder nach grösseren Anstrengungen wie Transporten und Turnieren vermehrt Anzeichen von Unwohlsein (Flehmen, Koliksymptome, vermehrtes Liegen...)?

Immer

Nie

1 ----- 2 ----- 3 ----- 4 ----- 5 ----- 6 ----- 7 ----- 8 ----- 9



## Questionnaire (French)

### Partie 1:

Date: \_\_\_\_\_

#### Questions générales:

Numéro UELN/SVPS: \_\_\_\_\_

Nom du cheval: \_\_\_\_\_

Signalement (Race, Sexe, Age, Robe): \_\_\_\_\_

Discipline (p.ex. saut, dressage etc.): \_\_\_\_\_

Nom du propriétaire et du cavalier/de la cavalière: \_\_\_\_\_

Numéro du téléphone: \_\_\_\_\_

Email: \_\_\_\_\_

Lieu de détention (canton): \_\_\_\_\_

Origines/Pedigree : P: \_\_\_\_\_ MP: \_\_\_\_\_

Depuis quand le cheval vous appartient-il ou depuis quand le connaissez-vous? \_\_\_\_\_

#### Tempérament du cheval?

calme, serein       dynamique, mais coopérant       nerveux, pas très coopérant

#### Détention du cheval:

##### 1) Votre cheval vit-il dans un groupe des chevaux?

Oui       seulement au pré  
 Non

##### 2) Combien d'heures par jour le cheval est-il dehors (pré, monté, attelé)?

0-1h       1-4h       4-12h       > 12h

#### Alimentation:

##### 3) Votre cheval, se bat-il pour la nourriture?

Oui       Non

##### 4) Comment est l'appétit de votre cheval ?

très bien, il mange tout  
 modéré, parfois il mange avec des petites pauses  
 insuffisant, le cheval mange seulement lentement et pas tout

## **Entraînement:**

### **5) Combien de fois est-il entraîné par semaine?**

- < 1 fois                       4-5 fois                       7 fois  
 1-3 fois                       6 fois

### **6) Combien de personnes montent/entraînent le cheval?**

- 1                       2                       3                       >3

### **7) Combien de fois par année va-t-il en concours?**

- 1-3 fois       4-8 fois       9-15 fois       16-25 fois       plus de 15 fois

### **8) Quelle est le niveau de concours de votre cheval? \_\_\_\_\_**

### **9) Comment est la performance du cheval par rapport au niveau de formation?**

- très bien/bien  
 suffisante  
 insuffisante/mauvaise

### **10) Est-ce que le cheval est motivé durant le travail?**

- très bien/bien  
 suffisante  
 insuffisante/mauvaise

### **11) Est-ce que la motivation de votre cheval change au cours du travail? (plusieurs réponses possibles)?**

- Non  
Si oui:                       au début pas bien  
                                     au milieu du travail pas bien  
                                     à la fin du travail pas bien  
                                     toujours pas bien  
                                     changeant  
                                     pendant la saison pas bien

### **12) Est-ce que le cheval a du plaisir naturel de bouger (quand on monte à cheval, sur le pré etc.)?**

- Oui, beaucoup de plaisir de bouger  
 Suffisante de plaisir de bouger  
 Oui, quand on le monte à cheval, mais pas sur le pré  
 Oui, sur le pré, mais pas quand on le monte à cheval  
 No, il n'a pas du plaisir de bouger

## **Stéréotypies:**

- |                                   |                                      |                                            |                                        |                                              |
|-----------------------------------|--------------------------------------|--------------------------------------------|----------------------------------------|----------------------------------------------|
| - Tic à l'ours?                   | <input type="checkbox"/> pas du tout | <input type="checkbox"/> de temps en temps | <input type="checkbox"/> régulièrement | <input type="checkbox"/> permanent, excessif |
| - Tic à l'appui?                  | <input type="checkbox"/> pas du tout | <input type="checkbox"/> de temps en temps | <input type="checkbox"/> régulièrement | <input type="checkbox"/> permanent, excessif |
| - Tic à l'air?                    | <input type="checkbox"/> pas du tout | <input type="checkbox"/> de temps en temps | <input type="checkbox"/> régulièrement | <input type="checkbox"/> permanent, excessif |
| - Tourner en rond?                | <input type="checkbox"/> pas du tout | <input type="checkbox"/> de temps en temps | <input type="checkbox"/> régulièrement | <input type="checkbox"/> permanent, excessif |
| - Râper les dents contre le bois? | <input type="checkbox"/> pas du tout | <input type="checkbox"/> de temps en temps | <input type="checkbox"/> régulièrement | <input type="checkbox"/> permanent, excessif |

## **Problèmes de comportement:**

- |                              |                                      |                                            |                                        |                                              |
|------------------------------|--------------------------------------|--------------------------------------------|----------------------------------------|----------------------------------------------|
| - Coller à d'autres chevaux? | <input type="checkbox"/> pas du tout | <input type="checkbox"/> de temps en temps | <input type="checkbox"/> régulièrement | <input type="checkbox"/> permanent, excessif |
| - Mordre?                    | <input type="checkbox"/> pas du tout | <input type="checkbox"/> de temps en temps | <input type="checkbox"/> régulièrement | <input type="checkbox"/> permanent, excessif |
| - Taper?                     | <input type="checkbox"/> pas du tout | <input type="checkbox"/> de temps en temps | <input type="checkbox"/> régulièrement | <input type="checkbox"/> permanent, excessif |
| - Ruer?                      | <input type="checkbox"/> pas du tout | <input type="checkbox"/> de temps en temps | <input type="checkbox"/> régulièrement | <input type="checkbox"/> permanent, excessif |
| - Pointer?                   | <input type="checkbox"/> pas du tout | <input type="checkbox"/> de temps en temps | <input type="checkbox"/> régulièrement | <input type="checkbox"/> permanent, excessif |
| - Taper contre la paroi?     | <input type="checkbox"/> pas du tout | <input type="checkbox"/> de temps en temps | <input type="checkbox"/> régulièrement | <input type="checkbox"/> permanent, excessif |

|                          |                                                                                                                                                     |
|--------------------------|-----------------------------------------------------------------------------------------------------------------------------------------------------|
| Pas du tout              | = Aucun signe de stéréotypies ou problèmes comportementaux                                                                                          |
| De temps en temps        | = Stéréotypies ou problèmes comportementaux n'apparaissant pas chaque jour                                                                          |
| Régulièrement            | = Stéréotypies ou problèmes comportementaux apparaissant chaque jour et se rapportant à un stimulus spécial (par exemple après la nourriture, etc.) |
| Permanent, excessivement | = Stéréotypies ou problèmes comportementaux apparaissant toute la journée, sauf pendant que le cheval est monté, etc.                               |

## **Symptômes:**

**Est-ce que vous avez observé un ou plusieurs des symptômes suivants?**

- bâillement excessif
- le cheval a maigri
- le cheval a des problèmes pour prendre du poids
- grincement de dents

## **Partie 2:**

(Marquer la bonne valeur d'une croix)

**1) (Nervosité)** Devient nerveux quand il y a des insectes ou du bruit etc.:

nerveux calme  
1 ----- 2 ----- 3 ----- 4 ----- 5 ----- 6 ----- 7 ----- 8 ----- 9

**2) (Concentration)** Le cheval est facile à entraîner, il n'est pas rapidement distrait et/ou n'est pas facilement dérangé/déconcentré

difficile facile  
1 ----- 2 ----- 3 ----- 4 ----- 5 ----- 6 ----- 7 ----- 8 ----- 9

**3) (Confiance en soi)** Le cheval est-il serein lorsqu'il est seul, séparé du groupe :

excité serein  
1 ----- 2 ----- 3 ----- 4 ----- 5 ----- 6 ----- 7 ----- 8 ----- 9

**4) (Entraînement)** Le cheval est-il facile à entraîner et comprend-il rapidement les exercices :

difficile facile  
1 ----- 2 ----- 3 ----- 4 ----- 5 ----- 6 ----- 7 ----- 8 ----- 9

**5) (Excitabilité)** Est-il rapidement excitable:

Excitable facilement n'est pas excitable  
1 ----- 2 ----- 3 ----- 4 ----- 5 ----- 6 ----- 7 ----- 8 ----- 9

**6) (l'amabilité envers les hommes)** N'est pas agressive ou anxieux:

revêche aimable/affable  
1 ----- 2 ----- 3 ----- 4 ----- 5 ----- 6 ----- 7 ----- 8 ----- 9

**7) (Curiosité)** S'intéresse vivement aux nouveaux objets et s'en approche:

rarement fréquemment  
1 ----- 2 ----- 3 ----- 4 ----- 5 ----- 6 ----- 7 ----- 8 ----- 9

**8) (Mémoire)** Se souvient-il de ce qu'il a appris ou entraîné:

Non excellent  
1 ----- 2 ----- 3 ----- 4 ----- 5 ----- 6 ----- 7 ----- 8 ----- 9

**9) (Panique)** S'affole vite:

fréquemment jamais  
1 ----- 2 ----- 3 ----- 4 ----- 5 ----- 6 ----- 7 ----- 8 ----- 9

**10) (Coopération)** Est coopératif au maniement/soins:

non oui  
1 ----- 2 ----- 3 ----- 4 ----- 5 ----- 6 ----- 7 ----- 8 ----- 9

**11) (Humeur changeante)** Est capricieux/incalculable:

inconstant constant  
1 ----- 2 ----- 3 ----- 4 ----- 5 ----- 6 ----- 7 ----- 8 ----- 9

**12) (Entêtement)** Est entêté quand il refuse un commandement:

entêté s'adapte  
1 ----- 2 ----- 3 ----- 4 ----- 5 ----- 6 ----- 7 ----- 8 ----- 9



**13) (Docilité)** Est en général docile:

insoumis docile  
1 ----- 2 ----- 3 ----- 4 ----- 5 ----- 6 ----- 7 ----- 8 ----- 9

**14) (Vigilance)** Est vigilant vis-à-vis de l'environnement:

jamais toujours  
1 ----- 2 ----- 3 ----- 4 ----- 5 ----- 6 ----- 7 ----- 8 ----- 9

**15) (Persévérance)** Est patient avec nombreux stimuli:

impatient patient  
1 ----- 2 ----- 3 ----- 4 ----- 5 ----- 6 ----- 7 ----- 8 ----- 9

**16) (l'affabilité envers autres chevaux)** Interagit d'une manière amicale avec autres chevaux:

revêche aimable/affable  
1 ----- 2 ----- 3 ----- 4 ----- 5 ----- 6 ----- 7 ----- 8 ----- 9

**17) (Comportement de concurrence)** Est dominant dans les conflits:

dominé dominant  
1 ----- 2 ----- 3 ----- 4 ----- 5 ----- 6 ----- 7 ----- 8 ----- 9

**18) (Comportement ombrageux)** Facile à surprendre:

peureux courageux  
1 ----- 2 ----- 3 ----- 4 ----- 5 ----- 6 ----- 7 ----- 8 ----- 9

**19) (Timidité)** Est timide dans un nouvel environnement:

timide audacieux  
1 ----- 2 ----- 3 ----- 4 ----- 5 ----- 6 ----- 7 ----- 8 ----- 9

**20) (Coopération)** Est coopératif quand on monte à cheval:

jamais toujours  
1 ----- 2 ----- 3 ----- 4 ----- 5 ----- 6 ----- 7 ----- 8 ----- 9

**21) (Coopération)** Est coopératif quand on le charge dans van:

jamais toujours  
1 ----- 2 ----- 3 ----- 4 ----- 5 ----- 6 ----- 7 ----- 8 ----- 9

**22) (Coopération)** Est calme pendant le transport:

jamais toujours  
1 ----- 2 ----- 3 ----- 4 ----- 5 ----- 6 ----- 7 ----- 8 ----- 9

**23) (Résistance au stress)** A besoin de beaucoup de temps pour se reposer après un grand effort tel qu'un concours ou un transport:

Se repose très lentement se repose vite

1 ----- 2 ----- 3 ----- 4 ----- 5 ----- 6 ----- 7 ----- 8 ----- 9

**24) (Résistance au stress)** Est plus sensible pour des infections après un grand effort tel qu'un concours ou un transport. Par exemple au niveau des voies respiratoires (fièvre, toux, écoulement nasal, conjonctivite etc.):

Très sensible Pas sensible

1 ----- 2 ----- 3 ----- 4 ----- 5 ----- 6 ----- 7 ----- 8 ----- 9

**25) (Résistance au stress)** Le cheval donne souvent l'impression qu'il ne se sent pas bien après ou durant un grand effort tel qu'un concours ou un transport (par exemple: le cheval baille et se couche souvent, montre des symptômes de colique...)

toujours jamais

1 ----- 2 ----- 3 ----- 4 ----- 5 ----- 6 ----- 7 ----- 8 ----- 9

**26) (Résistance au stress)** Le cheval n'est pas intéressé par la nourriture après ou durant un grand effort tel qu'un concours ou un transport

toujours jamais

1 ----- 2 ----- 3 ----- 4 ----- 5 ----- 6 ----- 7 ----- 8 ----- 9
